# Supplementary material for: Epigenetic age and lung cancer risk in the CLUE II prospective cohort study
Source: publisher site journal article supplement (doi:10.18632/aging.204501), 2023-02-07
Supplement: Supplementary file [file aging-v15i3-204501-supplementary-material-SD1.pdf]

## SUPPLEMENTARY TABLES

**Supplementary Table 1. Odds ratios and 95% confidence intervals for the association between epigenetic age acceleration (using 3 different measures) and the risk of lung cancer in the CLUE II study, stratified by age and smoking status.**

|              | OR (95% CI)*      | p-value | OR (95% CI)*      | p-value |
|--------------|-------------------|---------|-------------------|---------|
|              | Age < 65 years    |         | Age ≥ 65 years    |         |
| AA_Hannum    | 0.63 (0.44, 0.90) | 0.011   | 0.90 (0.53, 1.52) | 0.69    |
| AA_Horvath   | 0.62 (0.44, 0.88) | 0.007   | 1.10 (0.69, 1.75) | 0.70    |
| AA_Pheno     | 0.76 (0.58, 1.00) | 0.046   | 1.07 (0.75, 1.52) | 0.72    |
| IEAA_Hannum  | 0.69 (0.48, 1.00) | 0.05    | 0.91 (0.52, 1.59) | 0.74    |
| IEAA_Horvath | 0.73 (0.52, 1.04) | 0.08    | 1.08 (0.67, 1.74) | 0.74    |
| IEAA_Pheno   | 0.74 (0.55, 0.98) | 0.035   | 1.13 (0.77, 1.67) | 0.52    |
|              | Current smoker**  |         | Former smoker**   |         |
| AA_Hannum    | 0.76 (0.49, 1.20) | 0.24    | 0.69 (0.44, 1.07) | 0.09    |
| AA_Horvath   | 0.68 (0.45, 1.02) | 0.06    | 0.82 (0.54, 1.27) | 0.38    |
| AA_Pheno     | 0.93 (0.68, 1.28) | 0.66    | 0.84 (0.61, 1.16) | 0.30    |
| IEAA_Hannum  | 0.93 (0.58, 1.48) | 0.76    | 0.71 (0.45, 1.12) | 0.14    |
| IEAA_Horvath | 0.81 (0.53, 1.22) | 0.31    | 0.91 (0.58, 1.43) | 0.69    |
| IEAA_Pheno   | 1.02 (0.73, 1.44) | 0.90    | 0.85 (0.60, 1.20) | 0.36    |

Abbreviation: IEAA: Intrinsic epigenetic age acceleration. \*Conditional logistic regression models, adjusting for batch effects, BMI, and smoking predicted packyears (using DNA methylation). \*\*Never smokers were not included in this analysis as there were too few.

**Supplementary Table 2. Correlations between epigenetic clocks and selected immune cell proportions (estimated from methylation data).**

|                     | AA<br>Hannum | IEAA<br>Hannum | AA<br>Horvath | IEAA<br>Horvath | AA<br>PhenoAge | IEAA<br>PhenoAge |
|---------------------|--------------|----------------|---------------|-----------------|----------------|------------------|
| <b>CD4 naïve</b>    | -0.3677      | -0.1935        | -0.1884       | -0.0011         | -0.2249        | -0.1104          |
| <b>p values</b>     | <0.0001      | 0.0051         | 0.0066        | 0.9877          | 0.0011         | 0.1124           |
| <b>CD8 naïve</b>    | -0.4245      | -0.4076        | -0.2305       | -0.1706         | -0.32          | -0.3196          |
| <b>p values</b>     | <0.0001      | <0.0001        | 0.0008        | 0.014           | <0.0001        | <0.0001          |
| <b>CD8 memory</b>   | 0.3316       | 0.1264         | 0.3202        | -0.0026         | -0.0203        | 0.098            |
| <b>p values</b>     | <0.0001      | 0.0689         | <0.0001       | 0.9706          | 0.7713         | 0.1591           |
| <b>B cell naïve</b> | -0.2507      | -0.1485        | -0.1786       | -0.0609         | -0.3272        | -0.1856          |
| <b>p values</b>     | 0.0003       | 0.0323         | 0.01          | 0.3831          | <0.0001        | 0.0073           |

Correlations for CD4 memory and B cell memory are not shown as the correlations were statistically significant. Abbreviation: IEAA: Intrinsic epigenetic age acceleration.
